# Supplementary material
Source: Springer Nature journal article supplement (https://www.springermedizin.de/resource/supplementary/12936_2010_1596_MOESM2_ESM.pdf/9541582)

### AMA1-C1 80ug

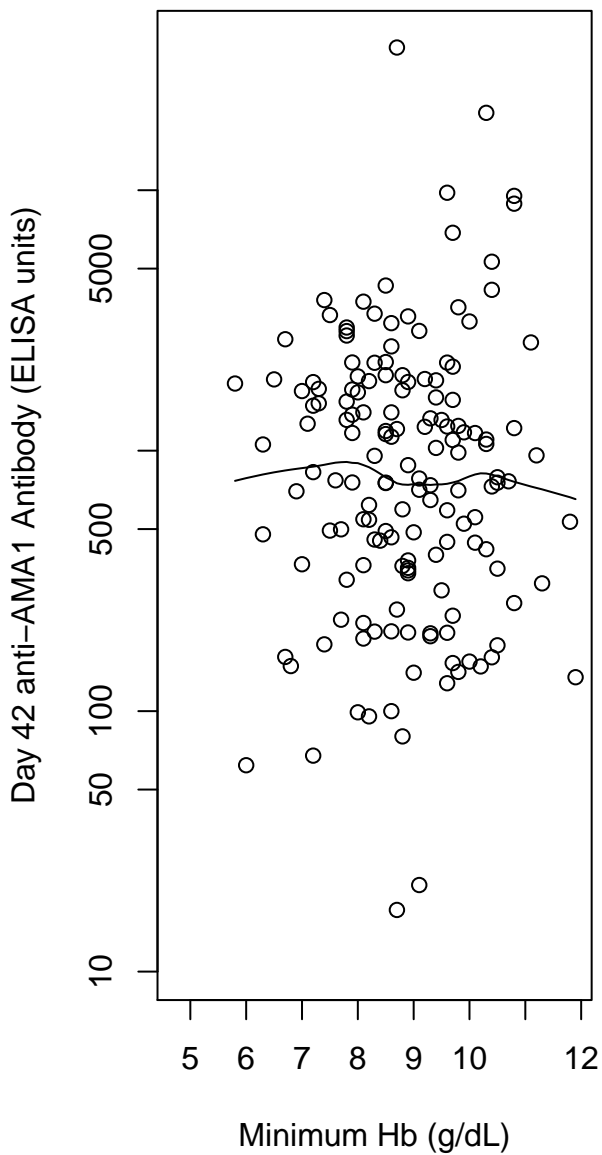

### Hiberix

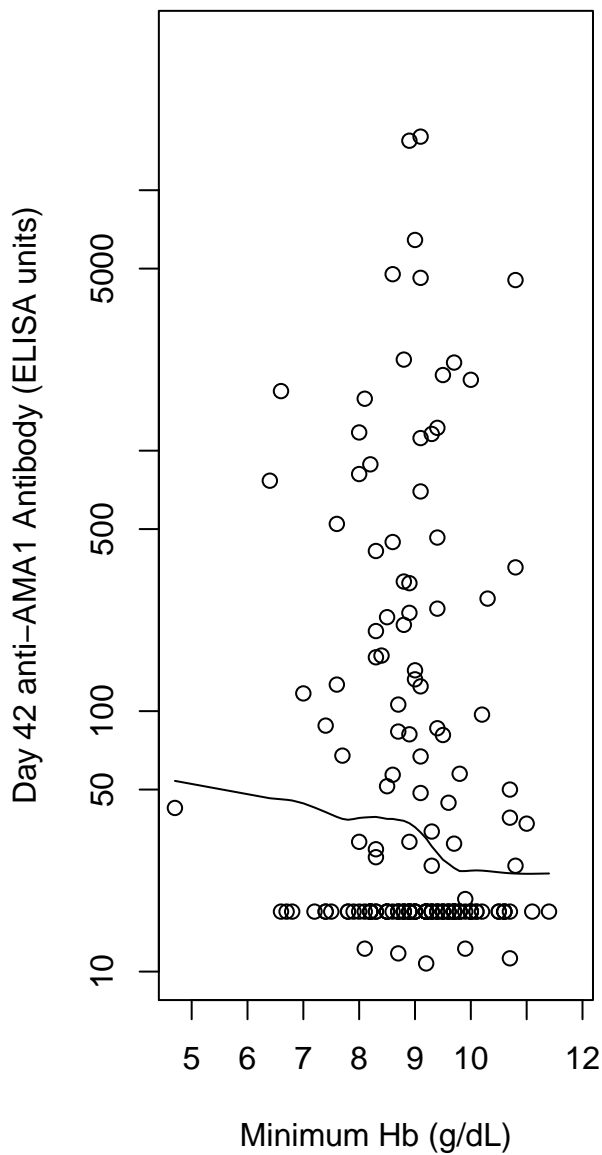

Supplement: MOESM2 [file 9541582]
